# Supplementary material for: Uniform carbon-coated CdS core–shell nanostructures: synthesis, ultrafast charge carrier dynamics, and photoelectrochemical water splitting
Source: Royal Society of Chemistry journal article supplement (doi:10.1039/c5ta09024e), 2015-12-09
Supplement: c5ta09024e1.pdf [file c5ta09024e1.pdf]

## Supplementary Information

### Uniform Carbon-Coated CdS Core-shell Nanostructures: Synthesis, Ultrafast Charge Carriers Dynamics, and Photoelectrochemical Water Splitting

*Sancan Han<sup>a</sup>, Ying-Chih Pu<sup>b</sup>, Lingxia Zheng<sup>a</sup>, Linfeng Hu<sup>a</sup>, Jinzhong. Zhang,<sup>b\*</sup> and Xiaosheng Fang<sup>a\*</sup>*

*a. Department of Materials Science, Fudan University Shanghai 200433 (P. R. China)*

E-mail: xshfang@fudan.edu.cn (X.S. Fang)

*b. Department of Chemistry and Biochemistry, University of California, Santa Cruz, California 95064, United States*

E-mail: zhang@ucsc.edu (J. Z. Zhang)

Figure S1. TEM images of pure carbon materials by the pyrolysis of ascorbic acid during hydrothermal reaction.

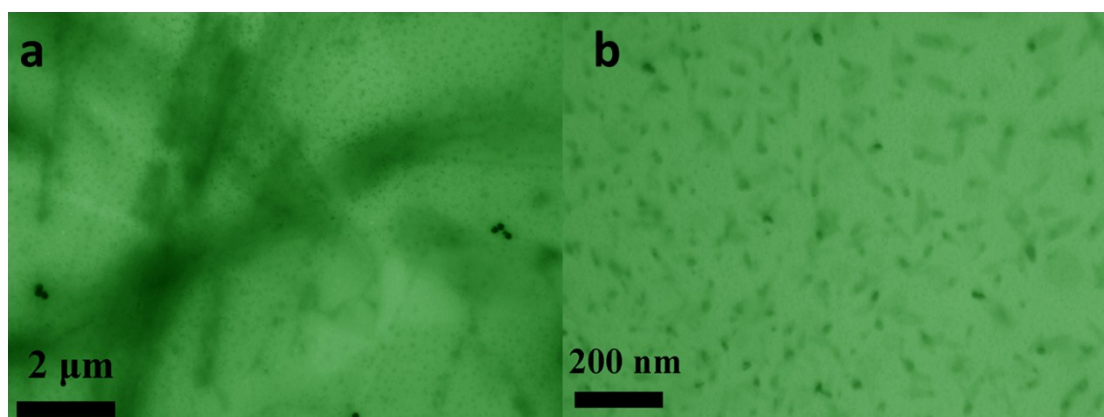

Table S1. Chemical composites of pure carbon materials and CdS/ C composites determined by high-resolution XPS.

| Peaks | Position (eV) |       | %      |       |
|-------|---------------|-------|--------|-------|
|       | Pure C        | C/CdS | Pure C | C/CdS |
| C-C   | 284.5         | 284.5 | 81.4%  | 81%   |
| C-O   | 286.6         | 286.6 | 1.8%   | 8.5%  |
| C=O   | 287.7         | 288.4 | 16.8%  | 10.6% |
